# Supplementary material
Source: PubMed Central journal article supplement (PMC6487634)
Supplement: NIHMS1018313-supplement-supp.pdf [file NIHMS1018313-supplement-supp.pdf]

# Modulation of Alzheimer's A $\beta$ protofilament-membrane interactions by lipid headgroups

---

## Supporting Information

Florentina Tofoleanu<sup>1</sup>, Bernard R. Brooks<sup>1</sup> and Nicolae-Viorel Buchete<sup>2,\*</sup>

<sup>1</sup>*Laboratory of Computational Biology, National Heart Lung and Blood Institute, National Institutes of Health, Bethesda, Maryland 20892, United States*

<sup>2</sup>*School of Physics & Complex and Adaptive Systems Laboratory, University College Dublin, Belfield, Dublin 4, Ireland*

Date: January 24<sup>th</sup>, 2015

\* Email: [buchete@ucd.ie](mailto:buchete@ucd.ie)

**Movie S1.** Animation (MPG movie) showing a representative trajectory of favorable interactions between the A $\beta$  system S2 and a model POPE membrane. This SI movie is available via the Internet at <http://pubs.acs.org>.

**Movie S2.** Animation (MPG movie) showing a representative trajectory of unfavorable interactions between the A $\beta$  system S1b and a model POPC membrane. The fibrillar oligomer is clearly dissociated from the POPC membrane at the end of the 55ns trajectory. This SI movie is available via the Internet at <http://pubs.acs.org>.

**Table S1.** Details of the MD parameters used for the atomistic model of the POPC bilayer interacting with the various A $\beta$  -POPC systems

| System name | No. of atoms                                         | Initial Volume ( $\text{\AA}^3$ ) | Minimization/ Heating | NPT   |
|-------------|------------------------------------------------------|-----------------------------------|-----------------------|-------|
| POPC        | 73,749<br>(9X9 =81 lipids/leaflet)                   | 87.25X79.31 X102.67               | 20,000 steps/ 201ps   | 0.5ns |
| S1a         | 80,783                                               | 89X78X130                         | 20,000 steps/ 507ps   | 60ns  |
| S1b         | 80,084<br>More water removed, closer to the membrane | 89X78X130                         | 10,000 steps/ 507ps   | 55ns  |
| S2a         | 80,813                                               | 89X78X130                         | 20,000 steps/ 507ps   | 150ns |
| S2b         | 81,215<br>(S2 closer to membrane)                    | 89X78X130                         | 20,000steps/ 827ps    | 53ns  |
| S2c         | 80,813<br>(S2 equilibrated longer)                   | 89X78X130                         | 20,000 steps/ 637ps   | 45ns  |
| S3a         | 87,965                                               | 89X78X140                         | 20,000 steps 833ps    | 25ns  |
| S3b         | 89,720 atoms                                         | 89X79X140                         | 20,000 steps/ 827ps   | 30ns  |
| S3c         | 81,299 atoms                                         | 89X79X140                         | 20,000 steps/ 827ps   | 29ns  |
| S4a         | 89,942 atoms                                         | 89X79X140                         | 20,000 steps/ 827ps   | 50ns  |

**Table S2.** Parameters used for the Steered MD (MD) simulations

| System name | Number of lipids | Number of atoms | Minimization/Heating (ps) | NPT (ns) |
|-------------|------------------|-----------------|---------------------------|----------|
| S2-POPE     | 98               | 42,567          | 20 /201                   | 115      |
| S2-POPC     | 162              | 59,759          | 20/600                    | 107      |

## A $\beta$ protofilament-membrane interactions: Supplementary Information

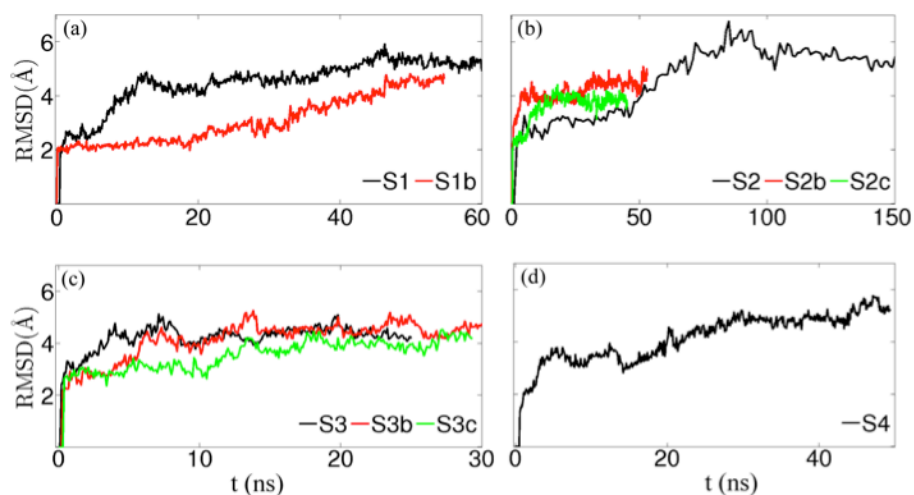

**Figure S1.** Root mean square deviation (RMSD) for the C $_{\alpha}$  atoms with respect to the initial structures (RMSD $_0$ ).

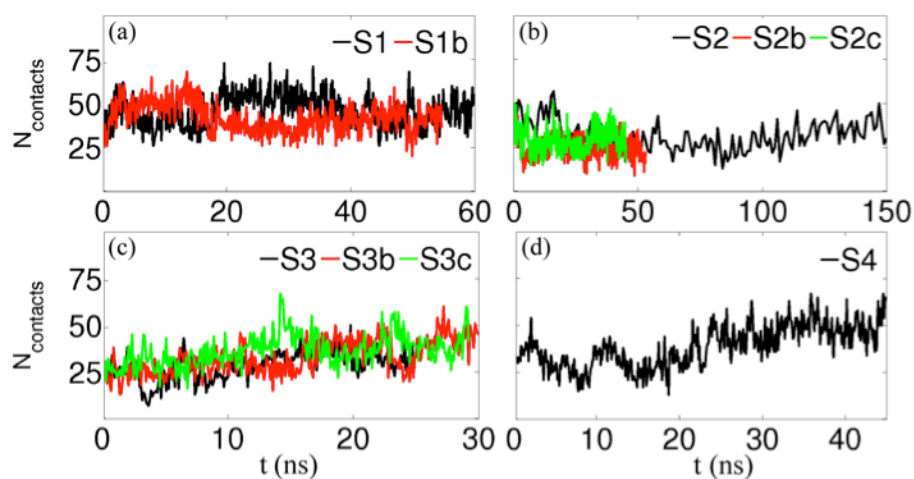

**Figure S2.** The number of inter-strand C-termini contacts ( $N_{\text{contacts}}$ ) versus time for systems in all S1-S4 conformations.

## A $\beta$ protofilament-membrane interactions: Supplementary Information

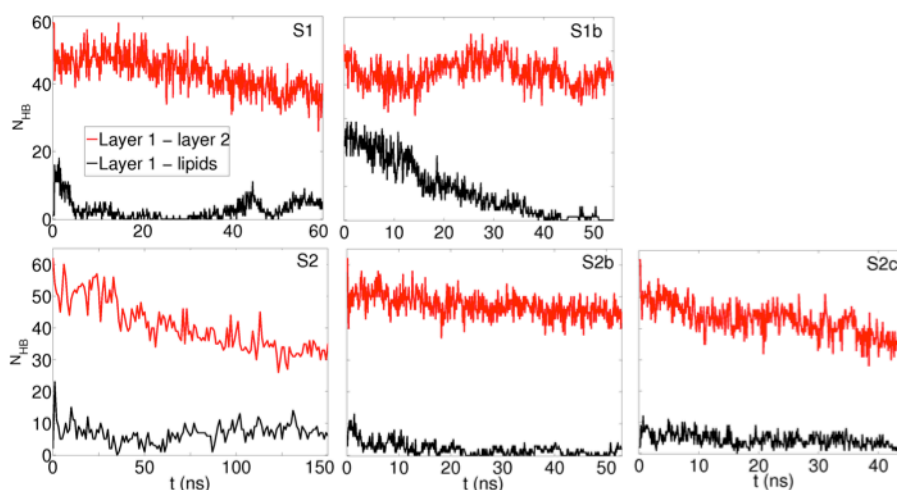

**Figure S3.** Hydrogen bonds between Layer 1 and Layer 2 (the first two layers in the protofilament closest to the membrane; red line) and between the Layer 1 in the protofilament and the lipids (black line) for systems in conformations S1 and S2.

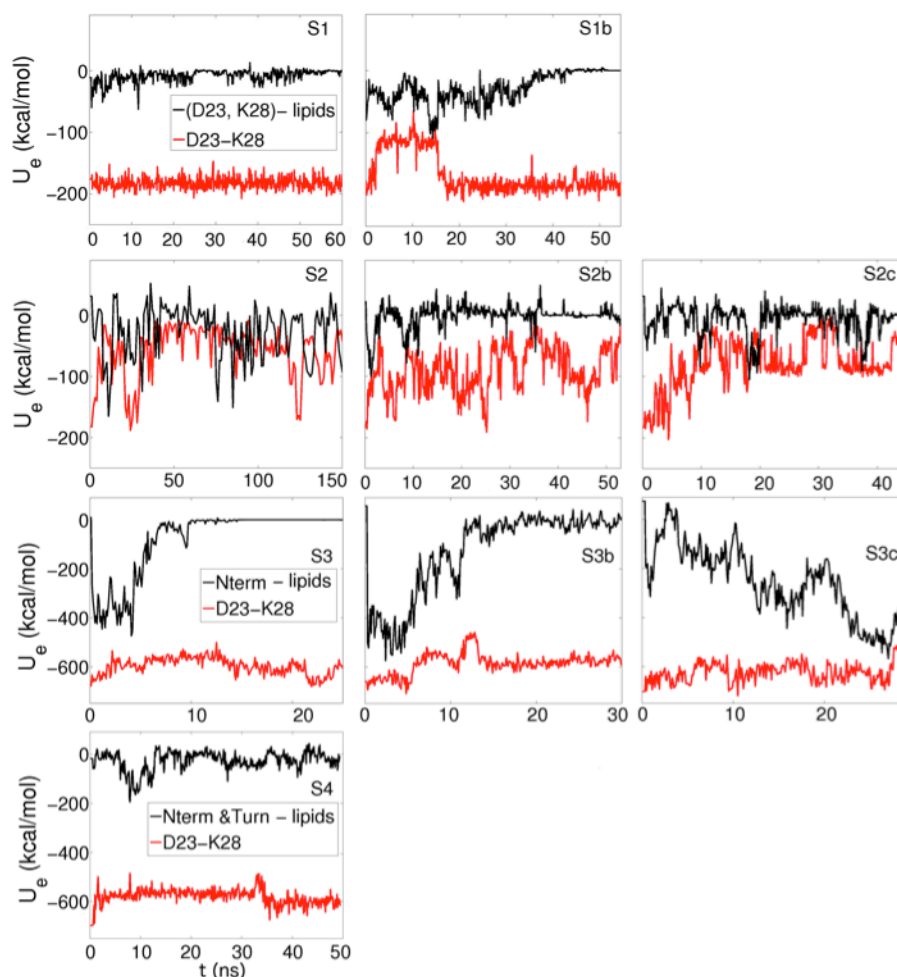

**Figure S4.** Electrostatic energies for all systems, with focus on the salt-bridge residues (D<sub>23</sub> and K<sub>28</sub>). The plots of the values for the interaction energies between D<sub>23</sub>, K<sub>28</sub> and lipids versus time are represented as black lines, and between D<sub>23</sub> and K<sub>28</sub> as red lines.

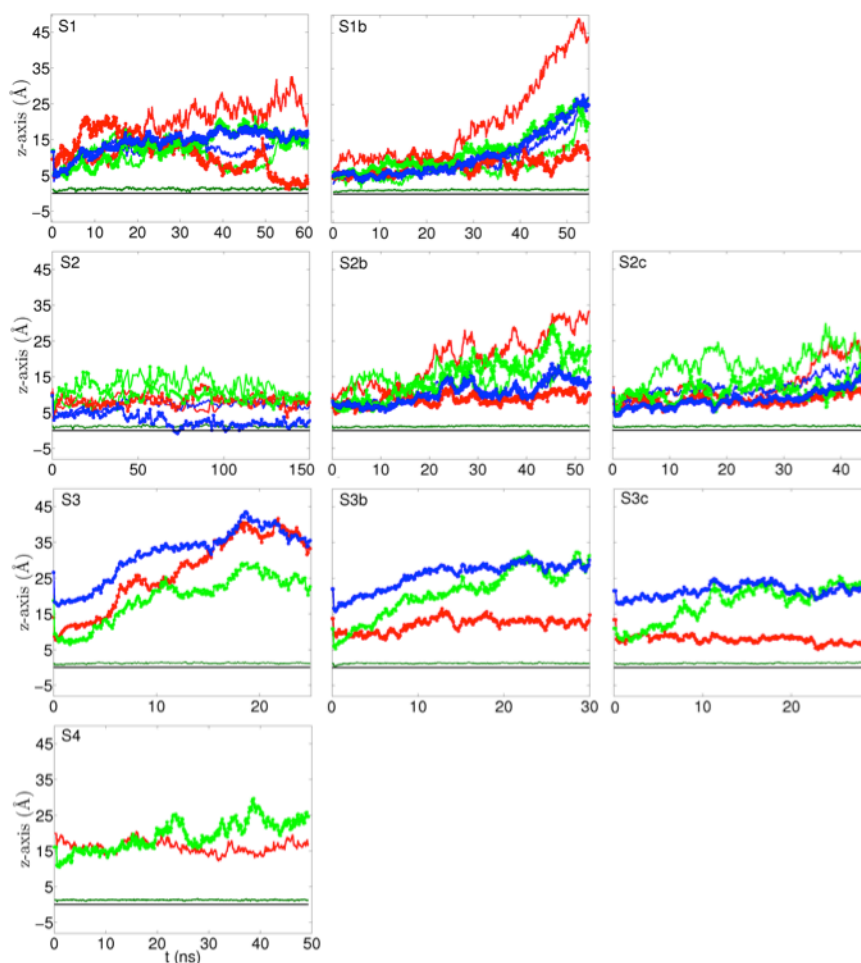

**Figure S5.** Z-axis position relative to the phosphorus atoms plane for charged residues in the N-terminus region (red), for charged residues in the turn region (bright green) and for the C-terminus (blue). The horizontal black line represents the phosphorus atoms plane and the dark-green line is the relative nitrogen atoms plane.

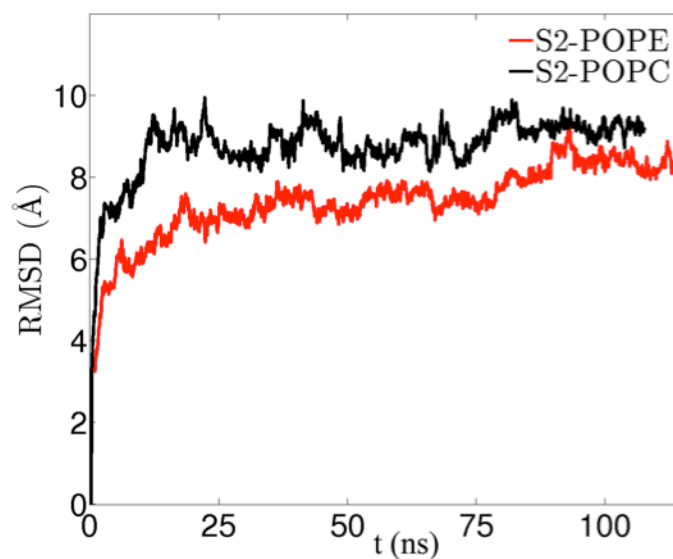

**Figure S6.**  $\text{RMSD}_0$  plot for S2-POPE and S2-POPC systems during the Steered Molecular Dynamics simulations. The plot lines have rougher aspects than in our previous MD simulations. The maximum values reached are 8 Å for S2-POPE and 9 Å for S2-POPC.

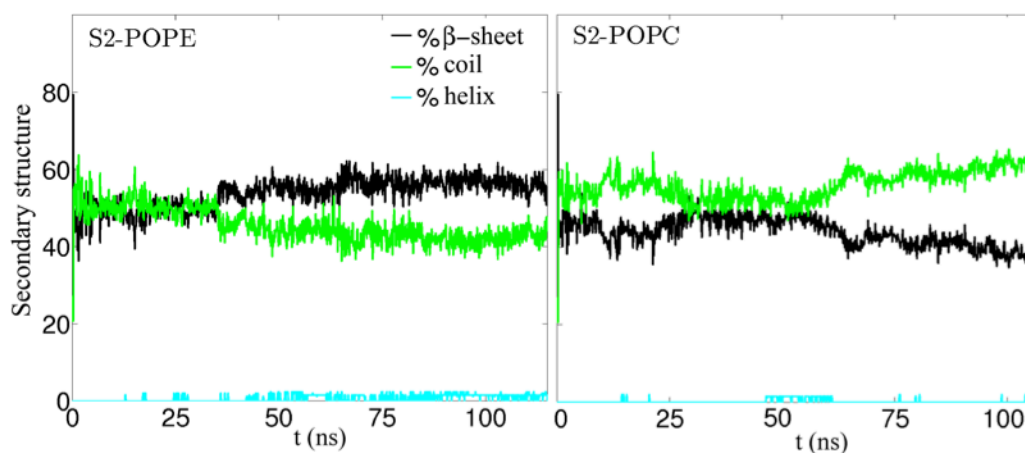

**Figure S7.** Secondary structure percentage of  $\beta$ -sheet, helix and coil during simulations of systems S2-POPE and S2-POPC.

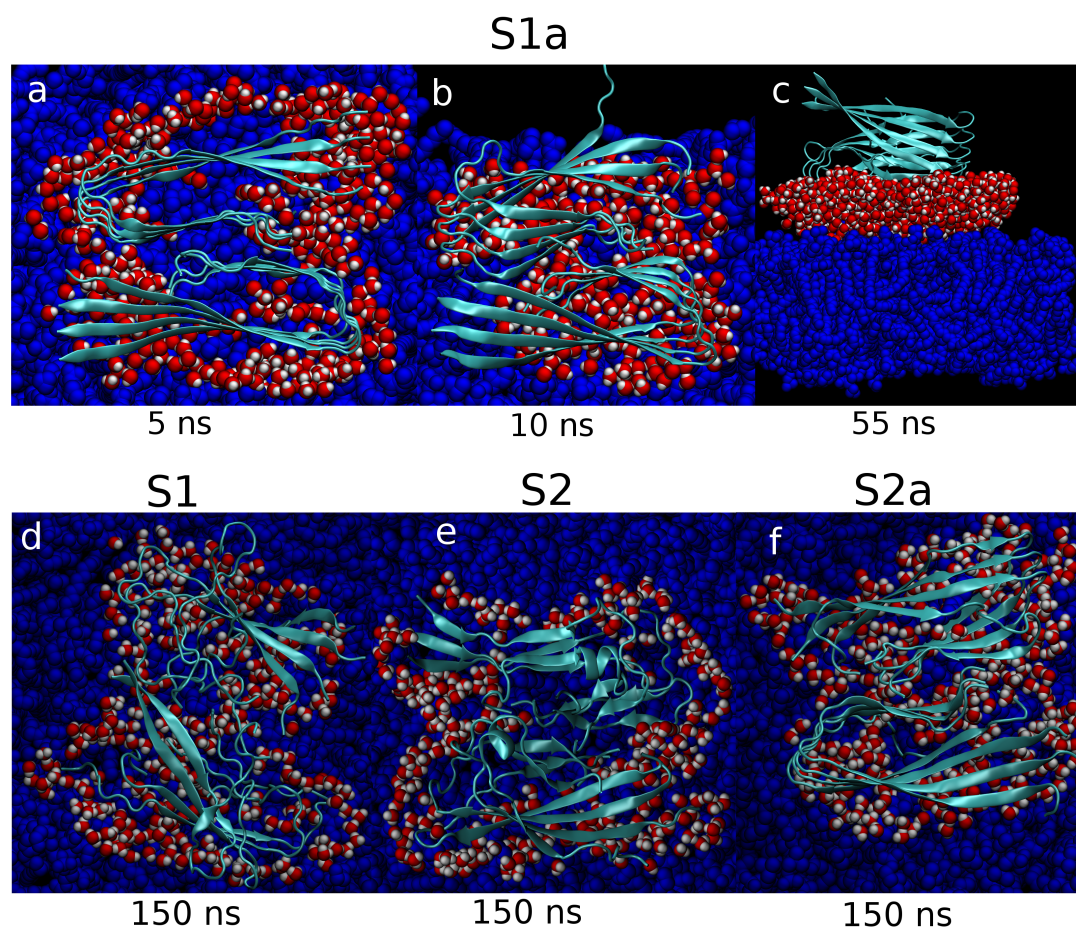

**Figure S8.** Water dynamics at the A $\beta$  fibril-membrane interface. The comparison here is between a representative system in which the fibril drifts apart (POPC bilayer, representative S1a), and systems in which the fibril maintains its interaction with the lipids (S1, S2/POPE bilayer, and S2a/POPC bilayer) (a) After only 4 to 5 ns, the peptides are still in direct contact with the membrane and the interface is still essentially dry, but (b) after 10 ns the A $\beta$ -lipid interaction becomes weaker and, finally, (c) at about 38 ns the water molecules accumulate between the fibril and the lipids such that the fibrillar oligomer is effectively solvated, as shown at 55ns. This progression is in contrast with cases illustrated in panels (d), (e) and (f) which show that due to the close A $\beta$ -lipid interaction in the POPE case, even after 150 ns of simulation, there are only a few water molecules at the fibril-membrane interface, even though the fibril structure is also lost to a greater extent (e.g., in S1, panel (d)).
